# Supplementary material
Source: PubMed Central journal article supplement (PMC3332328)
Supplement: NIHMS369909-supplement-supplement.pdf [file NIHMS369909-supplement-supplement.pdf]

*Supplement Material*

*Constructs cloned into recombinant adenovirus* - The stem-loop precursor of mmu-miR-199a-1 was synthesized and cloned into pDC316 shuttle vector. For a negative control, a nonsense sequence was used in place of miR-199a, as previously described<sup>1</sup>. The miR-199a-eraser is a tandem repeat of the anti-sense of mature miR-199a sequence, as previously characterized by Sayed et al<sup>1</sup>. Human Hif-1 $\alpha$  (NM\_001530.2) cDNA was purchased from Origene and subcloned into pDC316 shuttle vector. A mutant (Hif1 $\alpha$  $\Delta$ 199a) was constructed by excising nt 2761-2921 that encompass the miR-199a target sequence. Hairpin-forming oligonucleotides encompassing nt 2465-2485 of rat HIF1A (NM\_024359) or nt 2211-2231 of mouse Sirt1 (NM\_019812.1), were used for gene silencing. The Sirt1-expressing adenovirus was kindly provided by Dr. Junichi Sadoshima.

*Antibodies used* - anti-Procaspase 12, anti-Caspase 9, anti-Caspase 6, and anti-GAPDH (Chemicon, MA); anti-cleaved Caspase 3 (Cell Signaling Technologies, MA), anti-BNip1 (B. D. Biosciences, CA), anti-Hif-1alpha (Novus Biologicals, CO), anti-p53 (Genscript, NJ), anti-H2B (Upstate biotechnology, MA), anti-actin (Santa Cruz), anti-cytochrome c (Santa Cruz Biotechnologies, CA), anti-iNOS (Ana Spec, CA), anti-Sir-2 $\alpha$  (Upstate biotechnology, MA), anti-pHD2 (Novus Biologicals, CO), and anti-myosin-heavy chain (MHC) (Hybridoma Bank, University of Iowa, IO).

## References

1. Sayed D, Rane S, Lypowy J, He M, Chen IY, Vashistha H, Yan L, Malhotra A, Vatner D, Abdellatif M. MicroRNA-21 Targets Sprouty2 and Promotes Cellular Outgrowths. *Mol Biol Cell*. 2008;18:3272-3282.

hypoxia

miR-199a eraser

hypoxia + eraser

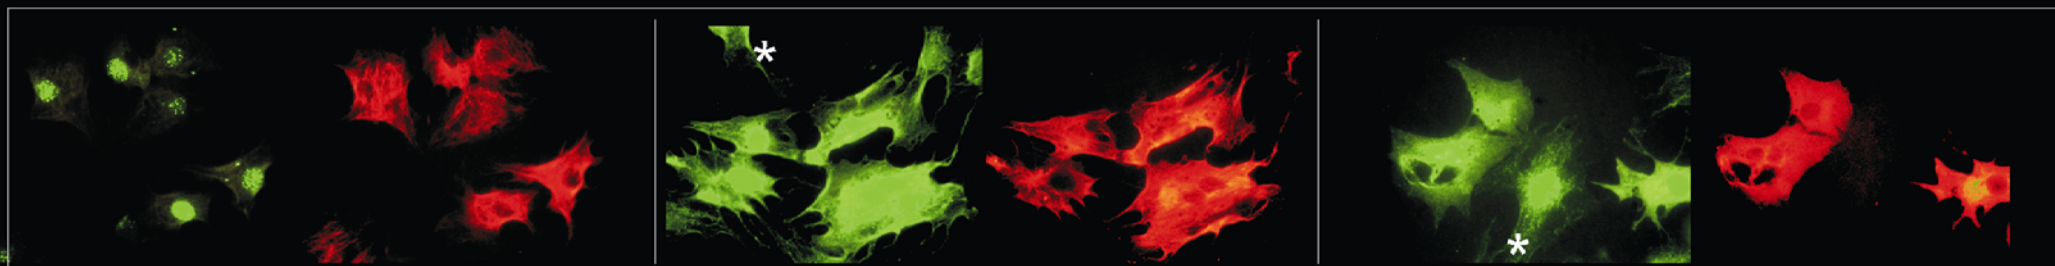

10  $\mu\text{m}$

anti-Hif1 $\alpha$

anti-MHC

**MiR-199a eraser induces upregulation of Hif-1 $\alpha$  in myosin heavy chain positive or negative cells, in primary neonatal myocyte cultures.** Myocytes were exposed to hypoxia for 24 h, miR-199a eraser for 24 h, or hypoxia+eraser, as indicated above each panel. Cells were then co-stained with anti-Hif-1 $\alpha$  and anti-myosin heavy chain (MHC, red) (n=2). The anti-Hif-1 $\alpha$  used in this experiment is a rabbit polyclonal versus the mouse monoclonal used in Fig.3a. \*Marks non-myocytes that are negative for MHC staining. The data prove that miR-199a is intrinsic in both myocytes and non-myocytes and targets Hif-1 $\alpha$ .

ONLINE FIGURE I
